# Supplementary material
Source: Springer Nature journal article supplement (https://www.springermedizin.de/resource/supplementary/13063_2008_276_MOESM2_ESM.pdf/9622442)

# Sample size projections for main comparisons

power=80%, sig=5%, prevalence in control arm=1%

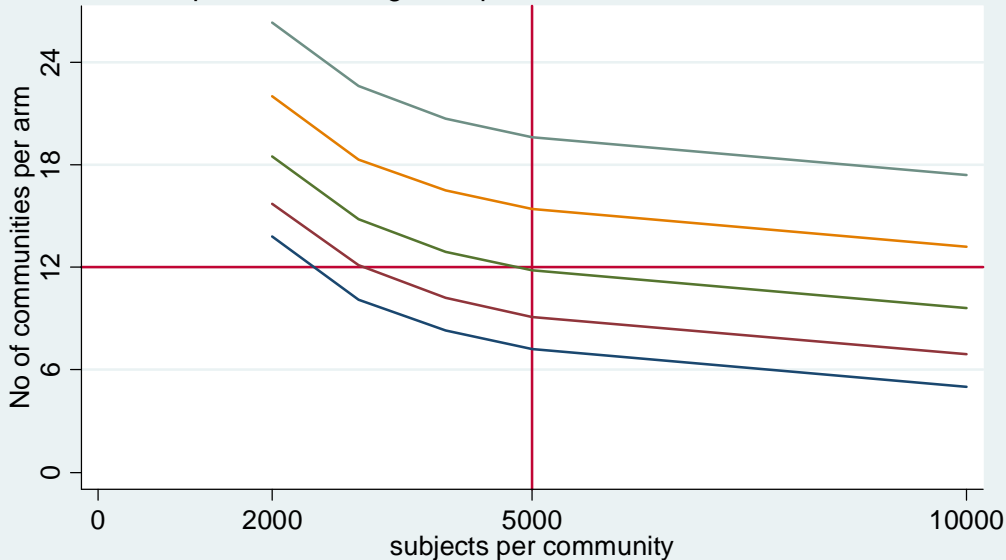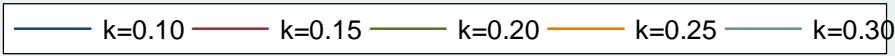

Supplement: MOESM2 [file 9622442]
